# Supplementary material
Source: PubMed Central journal article supplement (PMC5689452)
Supplement: NIHMS910791-supplement-Permission_fig_3.pdf [file NIHMS910791-supplement-Permission_fig_3.pdf]

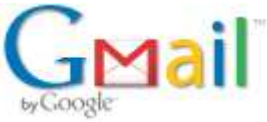

Molly Klemarczyk <mklemarczyk@circulationjournal.org>

---

## Fwd: Modified Figure 3 permission - CIRCULATIONAHA/2017/029400R3

1 message

---

**Circulation Journal** <circ@circulationjournal.org>  
To: Molly Klemarczyk <mklemarczyk@circulationjournal.org>

Wed, Sep 27, 2017 at 4:11 PM

----- Forwarded message -----

From: **Luciano Drager** <luciano.drager@incor.usp.br>  
Date: Wed, Sep 27, 2017 at 3:59 PM  
Subject: Modified Figure 3 permission - CIRCULATIONAHA/2017/029400R3  
To: [circ@circulationjournal.org](mailto:circ@circulationjournal.org)

Please see below the permission.

Sincerely,

Luciano

----- Mensagem encaminhada -----

**Assunto:**Re: Question - Figure Respiratory Care  
**Data:**Fri, 1 Sep 2017 18:39:06 +0000  
**De:**Ray Masferrer <[Masferrer@AARC.ORG](mailto:Masferrer@AARC.ORG)>  
**Para:**[luciano.drager@incor.usp.br](mailto:luciano.drager@incor.usp.br) <[luciano.drager@incor.usp.br](mailto:luciano.drager@incor.usp.br)>  
**CC:**Jeanette Chawdhury <[jeanette.chawdhury@AARC.ORG](mailto:jeanette.chawdhury@AARC.ORG)>, Sara Moore <[sara.moore@aacr.org](mailto:sara.moore@aacr.org)>

Dr. Drager,

Please accept this note as our permission for you to modify and publish a figure from RESPIRATORY CARE in the manner described in your email below. Have a great day.

Ray Masferrer  
Managing Editor, RESPIRATORY CARE

**Assunto:**Question - Figure Respiratory Care  
**Data:**Wed, 30 Aug 2017 18:23:36 -0300  
**De:**Luciano Drager <[luciano.drager@incor.usp.br](mailto:luciano.drager@incor.usp.br)>  
**Para:**[jeanette.chawdhury@AARC.ORG](mailto:jeanette.chawdhury@AARC.ORG), Sairam Parthasarathy <[sparthasarathy@deptofmed.arizona.edu](mailto:sparthasarathy@deptofmed.arizona.edu)>

Hi Jeanette,

I hope this e-mail will find you well. I need an assistance from you:

My name is Luciano Drager, Associate Professor of Medicine at University of Sao Paulo, Brazil.

We are finishing a review paper discussing the impact of the recent trials in the management of OSA and CSA. The paper is almost accept in

Circulation.

We included a figure describing the Servo ventilator principle. I was inspired by a figure from a colleague (Prof. Sairam Parthasarathy - copied here) in the following site:

[https://www.researchgate.net/publication/46034323\\_CPAP\\_and\\_Bi-level\\_PAP\\_therapy\\_New\\_and\\_established\\_roles](https://www.researchgate.net/publication/46034323_CPAP_and_Bi-level_PAP_therapy_New_and_established_roles)

An illustrator from Circulation made changes in the figure in order to not copy the figure, just the principle. I contacted Dr Sairam that recommended me to contact Respiratory Care Journal. Please let me know if I can publish the figure and mentioned in the legend something like:

"Modification with permission from Respiratory Care" and reference Sairam's paper.

Thank you so much for your attention.

Luciano

--

Luciano Drager, MD, PhD  
Hypertension Unit  
Heart Institute (InCor)  
University of Sao Paulo Medical School  
Brazil

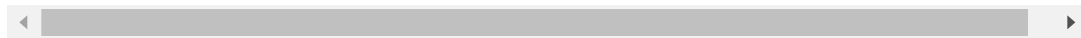

---

CONFIDENCIALIDADE. O conteúdo deste email é destinado apenas para uso do(s) destinatário(s) e contém informação privilegiada, reservada, estratégica, confidencial e sigilosa, sendo vedada sua divulgação para terceiros. Se você não é o destinatário deste email, observe, por favor, que é proibida qualquer forma de sua divulgação. Se você recebeu este email por engano, por favor, apague todas as suas cópias, incluindo todos os anexos, e notifique o remetente imediatamente.

CONFIDENTIALITY. The content of this email is intended only for use of recipient(s) and contains privileged, reserved, strategic, confidential and sensitive information, being prohibited its disclosure to third parties. If you are not the intended recipient of this email, note, please, which is prohibited any form of its disclosure. If you have received this email in error, please delete all copies, including all attachments and notify the sender immediately.
